RESEARCH ARTICLE

# The soluble loop BC region guides, but not dictates, the assembly of the transmembrane cytochrome $b_6$

Lydia Tome-Stangl<sup>1</sup>✉, Cornelia Schaetzel<sup>1</sup>✉, Stefan Tenzer<sup>2</sup>, Frank Bernhard<sup>3</sup>, Dirk Schneider<sup>1</sup>\*

**1** Institute of Pharmacy and Biochemistry, Johannes Gutenberg-University Mainz, Mainz, Germany, **2** Institute of Immunology, University Medical Center Mainz, Mainz, Germany, **3** Institute of Biophysical Chemistry, Goethe University Frankfurt am Main, Frankfurt am Main, Germany

✉ These authors contributed equally to this work.

\* [Dirk.Schneider@uni-mainz.de](mailto:Dirk.Schneider@uni-mainz.de)

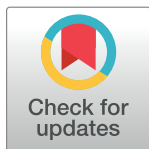

**OPEN ACCESS**

**Citation:** Tome-Stangl L, Schaetzel C, Tenzer S, Bernhard F, Schneider D (2017) The soluble loop BC region guides, but not dictates, the assembly of the transmembrane cytochrome  $b_6$ . PLoS ONE 12 (12): e0189532. <https://doi.org/10.1371/journal.pone.0189532>

**Editor:** Eric Cascales, Centre National de la Recherche Scientifique, Aix-Marseille Université, FRANCE

**Received:** July 6, 2017

**Accepted:** November 27, 2017

**Published:** December 14, 2017

**Copyright:** © 2017 Tome-Stangl et al. This is an open access article distributed under the terms of the [Creative Commons Attribution License](https://creativecommons.org/licenses/by/4.0/), which permits unrestricted use, distribution, and reproduction in any medium, provided the original author and source are credited.

**Data Availability Statement:** All relevant data are within the paper and its Supporting Information files.

**Funding:** D.S. was supported by grants from the Centre of Complex Matter (COMATT) and from the University of Mainz.

**Competing interests:** The authors have declared that no competing interests exist.

## Abstract

Studying folding and assembly of naturally occurring  $\alpha$ -helical transmembrane proteins can inspire the design of membrane proteins with defined functions. Thus far, most studies have focused on the role of membrane-integrated protein regions. However, to fully understand folding pathways and stabilization of  $\alpha$ -helical membrane proteins, it is vital to also include the role of soluble loops. We have analyzed the impact of interhelical loops on folding, assembly and stability of the heme-containing four-helix bundle transmembrane protein cytochrome  $b_6$  that is involved in charge transfer across biomembranes. Cytochrome  $b_6$  consists of two transmembrane helical hairpins that sandwich two heme molecules. Our analyses strongly suggest that the loop connecting the helical hairpins is not crucial for positioning the two protein “halves” for proper folding and assembly of the holo-protein. Furthermore, proteolytic removal of any of the remaining two loops, which connect the two transmembrane helices of a hairpin structure, appears to also not crucially effect folding and assembly. Overall, the transmembrane four-helix bundle appears to be mainly stabilized via interhelical interactions in the transmembrane regions, while the soluble loop regions guide assembly and stabilize the holo-protein. The results of this study might steer future strategies aiming at designing heme-binding four-helix bundle structures, involved in transmembrane charge transfer reactions.

## Introduction

Almost three decades ago, J.-L. Popot and D.M. Engelman proposed a simple model, describing the folding pathway of membrane proteins [1, 2], and this model has served many times as a valuable concept guiding the design of artificial transmembrane (TM) proteins. Based on the two-stage model, stable TM  $\alpha$ -helices initially integrate independently into a membrane (stage one), and subsequently sequence specific interactions between TM helices result in formation of a fully and functionally folded protein (stage two). However, in recent years multiple structures of  $\alpha$ -helical membrane proteins have been resolved, and based on these structures it

became evident that folding of  $\alpha$ -helical membrane proteins cannot be described by a simple two-step process in many cases [3–5]. Nevertheless, the two-stage model has proven to properly describe folding and assembly of several proteins with “simple” helix bundle structures [2, 6]. In cases where folding of these proteins involves cofactor binding, insertion of peripheral domains or quaternary structure formation, the original two-stage model was extended to cover these additional folding steps [7–10].

When a polypeptide chain contains multiple TM helices, extra-membranous loops covalently connect the individual TM helices, and the loops’ length and flexibility might define the helices’ translational and rotational freedom. Thus, especially short loops can be necessary to bring helices in close proximity, thereby promoting TM helix packing. While the number of amino acids in a loop can vary from just a few up to over one hundred [11, 12], a longer loop does not inevitably lead to an increased interhelical distance compared to a shorter loop, and the distance between the linked TM helices does not automatically correlate to the length of the loop [13]. Instead, the exact distance between two TM helices appears to be an exclusive question of helix packing [13]. However, for some  $\alpha$ -helical membrane proteins it has been shown that loops can be important for assembly and stability of the proteins [14]. Hence, modifications of a loop, such as alteration of the amino acid sequence, variation of the loop’s length or cleavage of the loop, might not only seriously influence the stability, but also folding and function of a membrane protein.

Loops can promote the assembly of individual TM helices and in some cases can even be vital for mediating and stabilizing helix-helix interactions. For bacteriorhodopsin it has *e.g.* been shown that none of its individual loops are essential for protein assembly [15–19]. Bacteriorhodopsin can assemble from protein fragments, although the assembled protein is less stable when compared to the wild type (wt) protein [17, 20]. In fact, molecular dynamic simulations of a helix-loop-helix motif from bacteriorhodopsin have indicated that loop deletion only remotely leads to structural and dynamic changes in the helices [21]. However, this effect is even limited to the termini of the helix, and interfacial regions are able to counterbalance the loss of inter-helical interactions caused by loop removal. Similarly, the cytoplasmic loops of rhodopsin are not vital for protein assembly [22]. In contrast, cleavage of the extracellular loops of the retinal visual pigment of mammals prevented protein assembly, indicating that the role of loops can severely differ [23, 24]. The deleterious effect observed upon cleavage of an extracellular loop could be caused by an increased helical flexibility and movement and, as a consequence, decreased intramolecular interactions.

In the present study, we have explored the impact of interhelical loops on folding, assembly and stability of the cofactor-containing TM protein cytochrome  $b_6$  (cyt.  $b_6$ ). Cyt.  $b_6$  is a core subunit of the cyt.  $b_6f$  complex that is involved in charge transfer across thylakoid membranes. The protein consists of four TM helices, which are covalently connected via three loops [25–27]. Two non-covalently bound heme cofactors are localized in the heme-binding pocket between two cyt.  $b_6$  “halves” formed by the helical hairpins AB and CD, and thus the four-helix bundle structure is stabilized by the heme molecules. Previous studies with TM b-type cytochromes, such as cyt.  $b_6$  [8, 28–32] or cyt.  $b_{559}$  [9, 33–37] have indicated that the respective holo-cytochromes spontaneously assemble *in vitro* and *in vivo* in presence of heme. The two b-type hemes of *in vitro* reconstituted cyt.  $b_6$  have redox potentials of -187 mV (the low-potential heme  $b_L$ ) and -68 mV (the high-potential heme  $b_H$ ), respectively [8], which is in perfect agreement with the potentials determined for cyt.  $b_6$  isolated from spinach thylakoid membranes [38] and cyt.  $b_6$  embedded within the *Escherichia coli* (*E. coli*) inner membrane [39]. Thus, cyt.  $b_6$  can be well reconstituted and studied *in vitro*. In fact, cyt.  $b_6$  and the homologous four N-terminal TM helices of cyt.  $b$  have served many times as blueprints for the *de novo* design of soluble as well as of TM b-type cytochrome-like structures (*e.g.* [40–47]).

In the past years, many aspects of the cyt.  $b_6$  folding pathway have been described [8, 29, 48, 49]. The TM apo-cyt.  $b_6$  inserts into a membrane independent of the cofactor, and after addition of heme to isolated membranes, spontaneous assembly of holo-cyt.  $b_6$  was observed [29]. These observations imply that the membrane-integrated apo-protein adopts a conformation that allows efficient heme incorporation. Subsequently, stepwise binding of the two non-covalently bound heme molecules was shown both, *in vivo* and *in vitro* [8, 50, 51]. Thus, the BC loop connecting TM helices AB and CD, respectively, might be crucial for formation of an open, clamshell-like structure, competent for heme binding. Formation of the holo-cytochrome is mediated by the heme cofactors and not only by TM helix-helix interactions, and it is therefore likely that the loop connecting the two helical hairpins has a more important role for directing helix interactions and cofactor binding. But how important are the loops really for assembly of the TM b-type cytochrome?

In our analyses, we mainly focused on the loop connecting the helical hairpins AB and CD. The here presented results show that neither elongation nor elimination of the loop connecting the two hairpins (halves) of cyt.  $b_6$  (AB and CD) has an impact on folding and assembly of the holo-protein. In fact, a cyt.  $b_6$ -like protein can be assembled from two fragments AB and CD and heme. Thus, the BC loop appears to not be crucial for positioning or orienting the halves during the folding pathway. Furthermore, removing any of the remaining two loops by protease cleavage appears also not to affect the stability of cyt.  $b_6$ . Likely, the holo-cytochrome can assemble solely from the TM regions and free heme. Thus, the soluble loop regions solely guide and stabilize the assembly of the heme-binding TM four-helix bundle structure.

## Material and methods

### Site-directed mutagenesis

Construction of the plasmid pRHMb<sub>6</sub>, coding for the *Spinacia oleracea* L cyt.  $b_6$  protein, N-terminally fused to the maltose-binding protein (MBP) of *E. coli*, has been described previously [30]. Mutation of the cyt.  $b_6$  amino acids His 86 and His 187 to alanine is described in [8]. For insertion of multiple Gly residues in the BC-loop, an overlap extension polymerase chain reaction (PCR) was performed. In two separate PCRs, the gene was mutated in two partly complementary parts. The resulting PCR products overlap in the area of the newly inserted mutation. The primers contained codons for Gly at the 5'-ending and a 3'-ending complementary to the cyt.  $b_6$  coding sequence before or after the point of insertion (between Pro 113 and Arg 114) (S1 Table, No. 1–4). In a third PCR, the 3'-ending of one of the products from the first PCRs served as primer for synthesis of the remaining PCR product and *vice versa*, and thus as a result the two parts of the mutated gene were connected. For unmodified endings of this third fragment, primers were used that were complementary to regions coding for the N- or C-terminus of cyt.  $b_6$ , respectively (S1 Table, No. 5–6). After restriction digestion by *Sac*I and *Bam*HI, the product of the third PCR was ligated into the equally restriction digested vector pRHMb<sub>6</sub>, resulting in the plasmids pRHMb<sub>6</sub>G<sub>5</sub> and pRHMb<sub>6</sub>G<sub>10</sub>.

### Expression, purification and reconstitution of cyt. $b_6$

Heterologous expression of cyt.  $b_6$  in *E. coli* HMS174(DE3) and subsequent purification from inclusion bodies, folding and reconstitution with heme for holo-protein formation were performed as described [30]. The proteins carrying mutations of His 86 and His 187 [8] or elongated BC-loops were purified as the wt protein. If needed, purified cyt.  $b_6$  was mixed with heme in excess and a subsequent purification step was performed via immobilized metal affinity chromatography (IMAC) to remove unbound heme. The purification was essentially performed as described [30], and the Ni-nitrilotriacetic acid (NTA)-matrix (Qiagen) was

equilibrated with 50 mM Tris pH 8.0, 50 mM NaCl and 1 mM *n*-dodecyl  $\beta$ -D-maltoside (DDM). Protein concentrations were determined via the bicinchoninic acid (BCA) protein assay [52] with a Pierce BCA Protein Assay Kit from Thermo Scientific (Rockford, USA) and BSA as standard protein for calibration.

In addition, cyt.  $b_6$  and the two halves, cyt.  $b_6$ -AB and cyt.  $b_6$ -CD, were obtained by cell-free synthesis in a continuous exchange cell-free system (CECF) without the MBP fusion tag [53]. The proteins were synthesized in the precipitate forming mode without addition of detergents or lipids. The precipitated proteins were harvested after incubation by centrifugation at 10,000 g for 10 min at 4°C and solubilized in 10 mM Tris, 100 mM sodium phosphate buffer pH 8.0 and 50 mM sodium dodecyl sulfate (SDS). IMAC-purification with Ni-NTA, folding and reconstitution with heme were performed as described for the cyt.  $b_6$  fusion protein. Heme solutions were prepared as described in [30] and concentrations were determined spectroscopically at 385 nm utilizing the extinction coefficient of 56 mM<sup>-1</sup> cm<sup>-1</sup> [54].

Heme-binding ratios were determined via titration experiments, and the stability of the reconstituted proteins was analyzed at increasing SDS concentrations, as described in [8, 30]. After each step, absorbance spectra were recorded under air-oxidized conditions and after reduction with 5 mM sodium dithionite. The relative absorbance changes were calculated as the ratio of the absorbance at 414 nm to 404 nm, representing the quotient of the maxima of the Soret-band of bound to unbound heme.

### Proteolytic digestion of cyt. $b_6$

Both, wt cyt.  $b_6$  and apo-cyt.  $b_6$  H86A H187A, were proteolyzed at room temperature using 0.02 mg proteinase K (Serva, Heidelberg) per mg protein. Aliquots were taken for analysis at distinct time points, and the digestion was stopped with 5 mM phenylmethanesulfonyl fluoride. Absorbance spectra were recorded from 350 to 700 nm with a band width of 0.5 nm directly, in the case of reconstituted holo-protein, or after addition of 5  $\mu$ M heme, in case of the apo-protein, under air-oxidized conditions and after reduction with 5 mM sodium dithionite. The holo-cyt.  $b_6$  fragments remaining after 5 h of proteolysis were separated by gel filtration, using a Superose™ 12 10/300 GL column (GE Healthcare) with buffer containing 50 mM Tris pH 8.0, 50 mM NaCl and 1 mM DDM, and were analyzed by mass spectrometry.

### Ultra-performance liquid chromatography

Capillary liquid chromatography of tryptic peptides was performed with a Waters NanoAcquity Ultra-Performance Liquid Chromatography system equipped with a 200  $\mu$ m x 5 mm PepSwift Monolithic Column (PS-DVB) thermostated at 55°C and a 2.6  $\mu$ L PEEKSIL-sample loop (SGE, Darmstadt, Germany). The aqueous mobile phase (mobile phase A) was H<sub>2</sub>O (LC-MS Grade, Roth, Freiburg, Germany) with 0.1% formic acid. The organic mobile phase (mobile phase B) was 0.1% formic acid in acetonitrile (LC-MS grade, Roth). Sample (1  $\mu$ L injection) were loaded onto the column in direct injection mode with 1% mobile phase B for 4 min at 800 nL/min. Peptides were eluted from the column with a gradient from 1–50% mobile phase B over 40 min at 800 nL/min followed by a 7 min rinse of 99% mobile phase B. The column was immediately re-equilibrated at initial conditions (1% mobile phase B) for 8 min. [Glu<sup>1</sup>]fibrinopeptide was used as lockmass at 100 fmol/ $\mu$ L. Lockmass solution was delivered from the auxiliary pump of the NanoAcquity system at 500 nL/min to the reference sprayer of the NanoLockSpray source.

### Mass spectrometry analysis

Mass spectrometric analysis of tryptic peptides was performed using a Synapt G2-S mass spectrometer (Waters Corporation) operated in v-mode with a typical resolution of at least 25,000

full width half maximum in positive mode electrospray ionization. The time of flight analyzer of the mass spectrometer was externally calibrated with a sodium iodide mixture from  $m/z$  50 to 1990. The data were post-acquisition lock mass corrected using the doubly charged monoisotopic ions of [Glu<sup>1</sup>]-fibrinopeptide B. Accurate mass liquid chromatography–mass spectrometry data were collected in data-independent mode of acquisition in combination with on-line ion mobility separations as described before [55].

## Data processing and peptide identification

Continuum LC-MS data were processed and searched using ProteinLynx GlobalSERVER version 3.0.2 (Waters Corporation). Peptide identifications were obtained by searching a custom-compiled database containing cytochrome sequences and *E. coli* proteins. Sequence information of proteinase K, and human keratins were added to the databases. The experimental data were typically searched with a three ppm precursor and ten ppm product ion tolerance, using settings for unspecific proteolytic digestion and variable methionine oxidation set as modification. Peptides with a minimum PLGS (ProteinLynx Global server) identification score of 6.5 (corresponding to a False Discovery Rate FDR <0.1% on peptide level) were used for further analysis.

## SDS-PAGE and Western blot analyses

SDS- polyacrylamide gel electrophoresis (PAGE) was used to separate protein samples according to their electrophoretic mobility [56]. The separated proteins were stained with Coomassie Brilliant Blue R250 or electro-blotted on a polyvinylidene difluoride membrane (Roth) with a semi-dry blotter (Bio-Rad) [57]. For Western blot analyses, antibodies directed against the His-tag (monoclonal, horseradish peroxidase (HRP)-conjugated, Novagen, 1:1000), the cyt.  $b_6$  N-terminus (SKVYDWFEER, polyclonal, rabbit, Gramsch Laboratories, Munich, Germany, 1:10000) or the cyt.  $b_6$  C-terminus (EIRKQGISGPL, polyclonal, rabbit, Gramsch Laboratories, Munich, Germany, 1:10000) were used. In case of the latter ones, anti-rabbit antiserum (HRP-conjugated (1:10000), Sigma-Aldrich) was used as a secondary antibody. If HRP-conjugated antibodies were used, membranes were developed using the Pierce ECL Western Blotting Substrate (Thermo Fisher Scientific Inc.), and chemiluminescence was detected using a Stella 3200 (Raytest).

## Results

### BC-loop prolongation does not affect the assembly and stability of cyt. $b_6$

Cyt.  $b_6$  has four TM  $\alpha$ -helices that are connected by loops, and two heme molecules are non-covalently bound via four histidine residues (Fig 1A) [25, 58]. *In vivo*, a third heme, heme  $c_n$ , is covalently bound via a cysteine residue to the periphery of cyt.  $b_6$  (Cys 35 in spinach cyt.  $b_6$ ) [25, 58]. However, we have previously shown that heme  $c_n$  is non-essential for holo-protein assembly [8], and a mutation of Cys 35 to alanine does not affect the amount of heme bound to the purified and reconstituted holo-protein [8, 30]. Thus, to completely eliminate the possibility that a third heme would eventually bind in our experiments, we used the cyt.  $b_6$  C35A mutant in our experiments and in the following we refer to this protein as “wt” (Fig 1B). The cyt.  $b_6$  TM helices A and B as well as the helices C and D form coiled coil structures in the holo-protein structure, and throughout this paper, we will refer to these helical hairpins as cyt.  $b_6$  “halves”. The two non-covalently bound hemes are sandwiched in between these two halves.

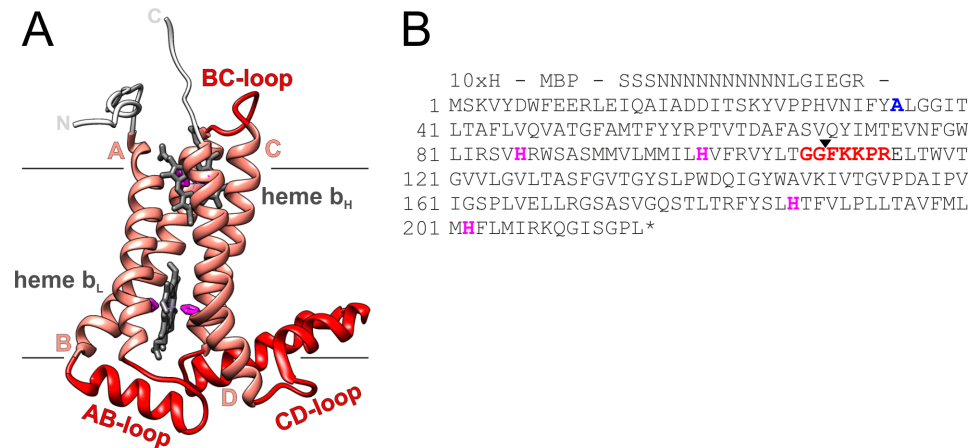

**Fig 1. Structure (A) and amino acid sequence (B) of cyt.  $b_6$ .** (A) Cyt.  $b_6$  consists of four TM helices (A to D, in rose) that bind two heme molecules non-covalently (heme  $b_H$  and heme  $b_L$ , gray) via histidine residues (pink) located in helices B and D. Separated by the cofactors, cyt.  $b_6$  is composed of two halves, consisting of the helices A and B and the helices C and D, respectively. The ribbon presentation is oriented as viewed from the plane of the (thylakoid) membrane and with the side of the chloroplast stroma on top. Both, C- and N-terminus are facing the stroma. The interhelical loops (red) are located within the stroma (BC loop) as well as within the thylakoid lumen (AB loop and CD loop) (PDB-ID 1VF5 from [27]). (B) Amino acid sequence of cyt.  $b_6$  from *Spinacia oleracea L* (underlined) with a deca-histidine-tag and the maltose-binding protein (MBP) of *E. coli* fused to the N-terminus (indicated). Amino acids discussed in the text are highlighted in bold. Blue: Ala 35. Originally, there is a Cys at this position, which covalently binds a third heme (heme  $c_n$ ) *in vivo*. However, heme  $c_n$  is not essential for the assembly of the b-type cytochrome [8]. Since we analyzed assembly of cyt.  $b_6$  by measuring the absorbance of the two non-covalently bound hemes  $b_L$  and  $b_H$ , we analyzed the C35A mutant and refer to it as “wt”. Pink: His 86, His 100, His 187 and His 202. These residues serve as axial ligands for the two non-covalent bound hemes. Red: Gly 108 to Arg 114. These amino acids form the BC-loop. To unravel the role of this loop, the BC-loop was elongated by five or ten Gly residues between Pro 113 and Arg 114. The black arrow between Gly 109 and Phe 110 highlights the boundaries of cf-cyt.  $b_6$ -AB and cf-cyt.  $b_6$ -CD.

<https://doi.org/10.1371/journal.pone.0189532.g001>

To unravel the role of individual loops connecting the cyt.  $b_6$  TM helices, we first evaluated the impact of the loop connecting the two cyt.  $b_6$  halves (AB and CD) on folding and stability of cyt.  $b_6$ , and we asked whether extending this loop has an impact on holo-protein assembly. As can be seen in the cyt.  $b_6$  crystal structure, the BC-loop is relatively small, consisting of solely seven amino acids with the sequence  $^{108}\text{Glu-Glu-Phe-Lys-Lys-Pro-Arg}^{114}$  [25, 27]. Because of this, we anticipated that the loop might be crucial for keeping the two cyt.  $b_6$  halves in close proximity prior to heme binding. With the help of overlap extension PCR, the BC-loop was elongated by five or ten Gly residues between Pro 113 and Arg 114. Thereby the length of the BC-loop was more than doubled. The prolongation increased the flexibility of the loop stepwise and thereby allowed an increased spatial distance between the two halves of the TM cytochrome. Cyt.  $b_6$ , cyt.  $b_6$ -G<sub>5</sub> and cyt.  $b_6$ -G<sub>10</sub> were heterologously expressed in *E. coli* as MBP-fused proteins and purified for further analyses (S1 Fig). It is well established that the formation of b-type holo-cytochromes can be properly visualized spectroscopically (e.g. [9, 29, 30, 34, 41, 42, 59–62]). The Soret- or  $\gamma$ -band at 400 to 430 nm is the most dominant band in the absorbance spectrum of free heme and of heme-containing proteins. If heme is properly incorporated in b-type cytochromes, the coordination sphere of heme changes due to heme binding to a protein via His or Met residues. This leads to a low-spin, six-fold-coordinated iron in the center of the heme porphyrin ring [63], which becomes evident as a red shift in the Soret-band absorbance maximum compared to free, unbound heme under both, oxidizing and reducing conditions. Furthermore, especially under reducing conditions the Soret-band of b-type cytochromes is sharpened compared to free, unbound heme and the splitting of the  $\alpha/\beta$  band region at 500 to

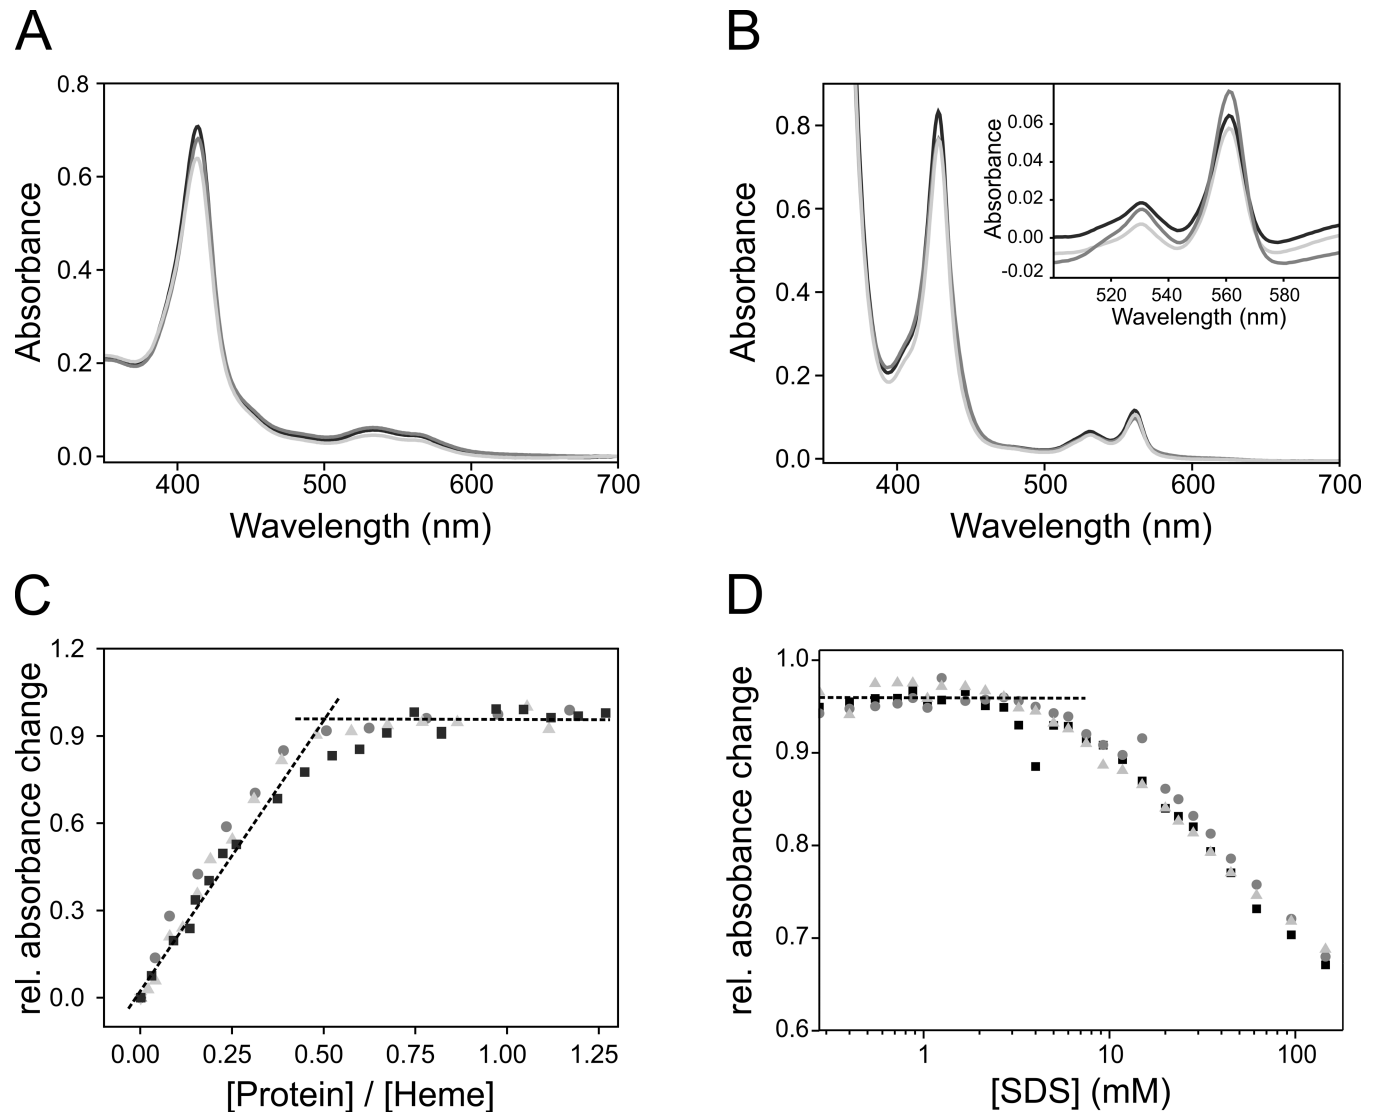

**Fig 2. *In vitro* reconstitution of cyt.  $b_6$  and its  $G_n$ -mutants containing prolonged BC loops.** Absorbance spectra of *in vitro* reconstituted cyt.  $b_6$  (black), cyt.  $b_6$ - $G_5$  (dark gray) and cyt.  $b_6$ - $G_{10}$  (light gray) under oxidizing (A) and reducing (B) conditions.  $G_5$  and  $G_{10}$  stands for the number of Gly residues inserted into the BC-loop. The absorbance maxima are essentially identical for all three proteins (A: 561 nm / 532 nm / 414 m; B: 562 nm / 532 nm / 429 nm for the  $\alpha$ - $\beta$ - $\gamma$ -band). The same applies for the redox difference spectra (562 nm / 532 nm for the  $\alpha$ - $\beta$ -band) (inlet B). (C) and (D) show titrations of cyt.  $b_6$  (black squares), cyt.  $b_6$ - $G_5$  (dark gray spheres) and cyt.  $b_6$ - $G_{10}$  (light gray triangles) with heme (C) or SDS (D) under oxidizing conditions. Each data point represents an individual measurement. The quotient of the absorbance intensity at 414 nm to 404 nm was calculated, representing the absorbance maximum of the Soret-band of bound and unbound heme, respectively, and normalized to "0" for solely free heme and "1" for solely bound heme. (C) Increasing amounts of protein were titrated into buffer containing 5  $\mu$ M heme to measure heme-binding isotherms. For all three proteins, the titration experiments show a saturation at a protein/heme ratio of 0.5 and higher. (D) To determine the proteins' stability, increasing amounts of SDS were added to reconstituted protein. All three cyt.  $b_6$  variants are stable up to an SDS concentration of  $\sim$ 4.5 mM.

<https://doi.org/10.1371/journal.pone.0189532.g002>

600 nm is far more pronounced. All these features are together diagnostic for proper *in vivo* and *in vitro* formation of b-type holo-cytochromes. In Fig 2A and 2B, absorbance spectra of *in vitro* reconstituted apo-cyt.  $b_6$  and its G-mutants are shown under oxidizing and reducing conditions. All three proteins have the  $\gamma$ -,  $\beta$ - and  $\alpha$ -absorbance maxima, characteristic for b-type cytochromes, at identical wavelengths. Under oxidizing conditions, the bandwidth of the Soret band at half maximum (*fwhm*) increased slightly for cyt.  $b_6$  with an elongated BC-loop (cyt.  $b_6$

wt: 24.0 nm, cyt.  $b_6$ -G<sub>5</sub>:27.4 nm, cyt.  $b_6$ -G<sub>10</sub>: 27.1 nm) indicating that the heme environment is slightly less well defined in the G-mutants under oxidizing conditions compared to the wt protein. However, under reducing conditions, the *fwhm* remained essentially constant with 22.6 nm for the wt cyt.  $b_6$  and 22.5 nm and 22.1 nm for the cyt.  $b_6$ -G<sub>5</sub> and cyt.  $b_6$ -G<sub>10</sub> mutants. Also, the redox difference spectra show identical peak maxima for all three proteins (inset in Fig 2B), indicating that the heme environments are essentially identical. The peak maxima and *fwhm*-values are in good agreement with previously described values obtained after analyses of purified cyt.  $b_6$  in DDM-micelles [8, 29–32, 39], membrane embedded cyt.  $b_6$  [29] as well as cyt  $b_6$  isolated from the cytochrome  $b_6f$  complex from spinach chloroplasts [64, 65] or cyanobacteria [66]. Thus, the spectral properties indicated stable and proper assembly of all reconstituted cyt.  $b_6$  G-mutants. However, the slight absorbance decrease of the  $\gamma$ -band and the small increase in *fwhm*-values of the oxidized cyt.  $b_6$  G-mutants (Fig 2A and 2B) might indicate slightly less rigid binding of the hemes with increasing length of the BC-loop.

To further reveal potential differences in heme binding and assembly of the G-mutants, the protein-to-heme-binding ratios were determined for all three proteins. Therefore, isotherms for heme binding to apo-cyt.  $b_6$  were determined by titrating a solution of heme with increasing amounts of protein (Fig 2C). The relative absorbance intensity increased for all three cyt.  $b_6$  variants with increasing protein concentrations until a plateau was reached, and further addition of protein resulted in stable relative absorbance levels. From this point on, all available heme molecules were bound. Cyt.  $b_6$ , cyt.  $b_6$ -G<sub>5</sub> and cyt.  $b_6$ -G<sub>10</sub> have an essentially identical heme-binding behavior, and a protein-to-heme-ratio of  $\sim 0.5$  was determined for all proteins, meaning that two heme molecules are bound by one protein molecule. This confirms the observation that the heme-binding affinity of cyt.  $b_6$  is essentially not affected by the BC-loop prolongation.

Next, the stability of the three cyt.  $b_6$  variants was assessed by stepwise denaturation of the TM protein by addition of increasing amounts of SDS, an established method, allowing to estimate the thermodynamic stability of  $\alpha$ -helical TM proteins [67–69]. Addition of SDS to a TM protein solubilized in a non-ionic detergent, here DDM, results in separation of the TM  $\alpha$ -helices, which causes loss of the tertiary contacts, whereas the  $\alpha$ -helical secondary structure typically remains intact. This SDS-induced denaturation in principle is a reverse of stage two of the two-stage model for protein folding. In case of cyt.  $b_6$  and its G-mutants, separation of the TM helices leads to a release of the heme cofactors, which can be detected by a decreased SORET-band absorption intensity (Fig 2D) [30]. At low SDS concentrations of up to 4.5 mM, no heme is released and the titration curve shows a plateau. Only at concentrations  $>4.5$  mM SDS, the relative absorbance steadily decreases, indicating that the helices start to dissociate and release heme. Importantly, this commences at the same SDS concentration for all three proteins, which again indicates that elongation of the BC-loop does no effect the stability and heme-binding capacity of cyt.  $b_6$ .

Together, cyt.  $b_6$ -G<sub>5</sub> and cyt.  $b_6$ -G<sub>10</sub> have spectral properties like the wt protein. Furthermore, the protein-to-heme-binding ratio and the proteins' stability against SDS-induced unfolding are also identical to the wt cyt.  $b_6$  protein. Thus, our data indicate that an extended BC-loop does essentially not affect the stability and heme-binding capacity of cyt.  $b_6$ , despite an increased distance and flexibility of the two cyt.  $b_6$  halves. Hence, a special proximity of the two helical hairpins AB and CD, mediated by the BC-loop, appears to not be essential for assembly and stabilization of cyt.  $b_6$ .

## Cyt. $b_6$ halves assemble to form the holo-protein

To further support the assumption that the cyt.  $b_6$  BC-loop is dispensable for protein assembly, we next tested, whether the two cyt.  $b_6$  halves are able to bind the cofactors when the two



halves are not covalently connected by a loop. Therefore, we aimed to express the two halves, AB and CD, independently. However, all attempts to heterologously express MBP-tagged fusion proteins in *E. coli* remained unsuccessful. Thus, the two cyt.  $b_6$  halves and, for the purpose of comparison, also the full-length cyt.  $b_6$ , were recombinantly synthesized in a cell-free expression system. In the following, they are denoted “cf” (cell free)-cyt.  $b_6$ -AB, cf-cyt.  $b_6$ -CD and cf-cyt.  $b_6$ , respectively. All three proteins were expressed without the MBP-fusion-tag, but with a deca-histidine-tag added at the respective N-terminus for purification. SDS-PAGE analyses of the samples before and after purification are shown in Fig 3A. Western blot analyses of the purified proteins are provided in the supplement (S2 Fig). After purification, both cf-cyt.  $b_6$  and cf-cyt.  $b_6$ -AB ran as a distinct protein band in an SDS gel at about the expected molecular masses (26.9 kDa for cf-cyt.  $b_6$  and 15.5 kDa for cf-cyt.  $b_6$ -AB) [70]. However, the purified cf-cyt.  $b_6$ -CD protein ran as two distinct protein bands with apparent molecular masses of 14 and 15 kDa in about equimolar quantities. The same protein band pattern can be observed in the Western blot analysis when an anti-His-tag antibody was used, revealing that both proteins contain an intact N-terminal His-tag. However, with an antibody directed against the very C-terminus of cyt.  $b_6$ , only the protein band at 15 kDa was detected in the Western blot analyses, and hence the 14 kDa protein band represents a C-terminally truncated version of cf-cyt.  $b_6$ -CD, potentially generated due to premature termination of translation during *in vitro* protein synthesis. Initial attempts to separate these two peptides failed. However, as the C-terminal amino acids are unstructured and are not involved in protein assembly or heme binding [25, 27], we rationalized that the fragment, which misses some C-terminal amino acids, assembles and binds heme as the wt. This assumption was confirmed by the measurements presented and discussed below. Thus, the about equimolar mixture of the full-length and C-terminally truncated cf-cyt.  $b_6$ -CD were used in the subsequent experiments.

To demonstrate that cf-apo-cyt.  $b_6$  can be refolded and reconstituted *in vitro* as properly as the MBP-fused protein, absorption spectra were measured after addition of heme to the purified cf-expressed protein (Fig 3B). Under both, oxidizing and reducing conditions, cf-holo-cyt.  $b_6$  displayed red-shifted and sharpened absorbance bands when compared to free heme (Fig 4A and 4B). These absorption characteristics were already detected before with the heterologously expressed cyt.  $b_6$ -MBP protein (Fig 2A and 2B). Also the redox difference spectra resemble the spectra of the MBP-fused protein. The absorbance band maxima are red-shifted and sharpened compared to free heme (Fig 4A and 4B). This demonstrates that holo-cyt.  $b_6$  spontaneously assembles after addition of heme, and thus, the cell-free expressed cf-cyt.  $b_6$  protein behaves the same way as the fusion protein expressed in *E. coli*. Next, cyt.  $b_6$  was assembled from the two cf-cyt.  $b_6$  halves. The two halves were mixed in equal amounts and heme was added in a total-protein-to-heme-ratio of one to one (Fig 3C). Again, absorbance maxima characteristic for cyt.  $b_6$  were recorded under oxidizing and reducing conditions as well as a characteristic redox difference spectrum, and the bandwidth *fwhm* value decreased. Thus, heme is tightly bound by a cyt.  $b_6$ -like protein assembled from the two cyt.  $b_6$  halves.

It is important to mention that the amount of cf-cyt.  $b_6$ -CD that contributes to the total protein-to-heme-ratio in Fig 3C and 3E was calculated based on a cf-cyt.  $b_6$ -CD concentration that includes both, the full-length as well as the C-terminally truncated CD fragment (Fig 3A). As we did not observe any characteristics of free heme in Fig 3C, such as a blue shift of the maxima, in the absorption spectra, C-terminal truncation of the cf-cyt.  $b_6$  CD did clearly not abolish heme binding.

In summary, the two cyt.  $b_6$  halves bind heme without being linked by a loop. Consequently, our data indicated that the BC-loop does not significantly influence cyt.  $b_6$  assembly and, therefore, is not essential for holo-protein assembly. However, as each of the two cyt.  $b_6$  halves contains two heme-ligating histidine residues, which are located on TM helix B and D,

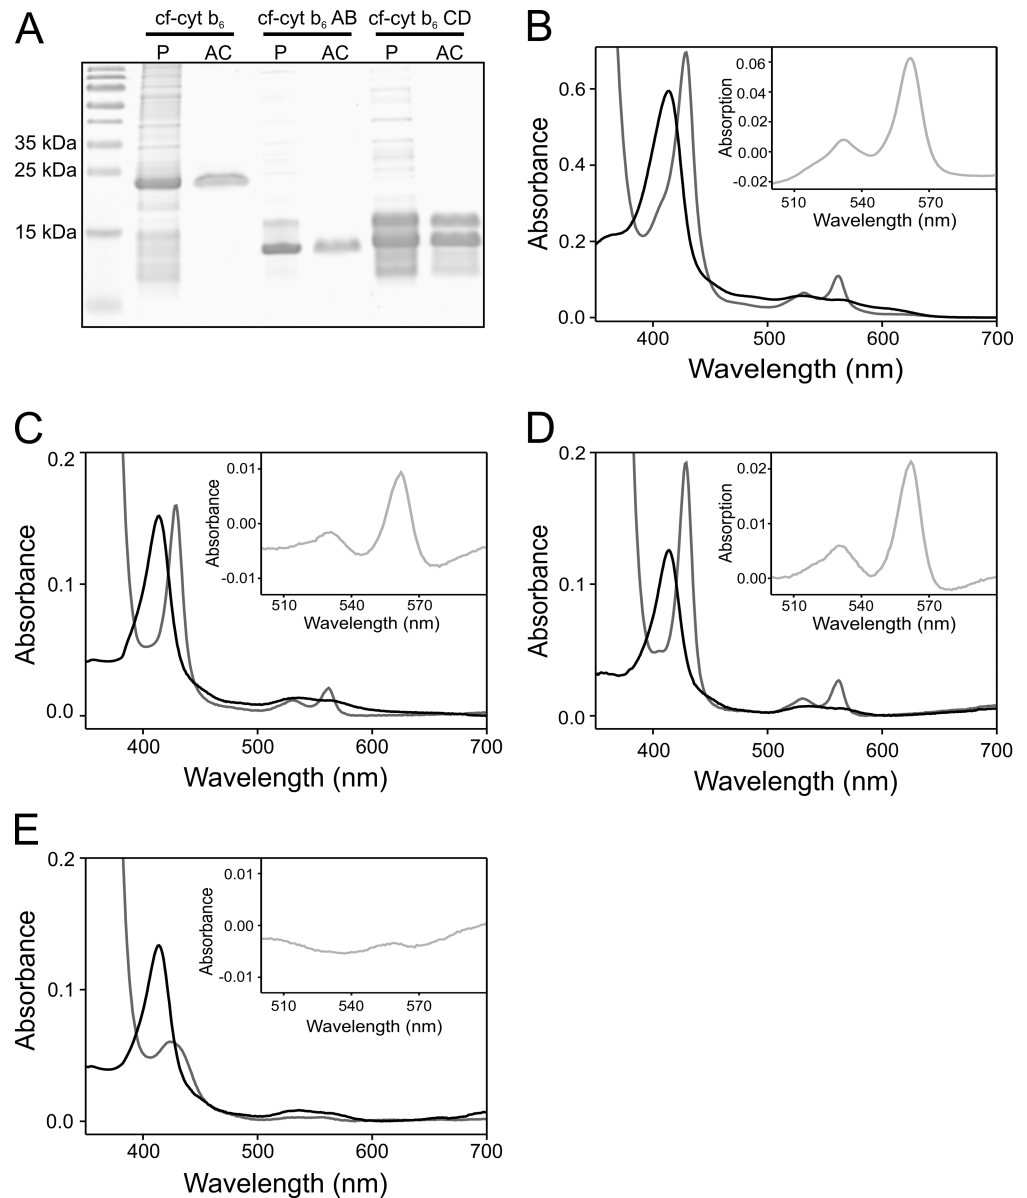

**Fig 3. Purification of cf-cyt.  $b_6$  and the two cyt.  $b_6$  halves cf-cyt.  $b_6$ -AB and cf-cyt.  $b_6$ -CD, and assembly of the cyt.  $b_6$  holo-protein.** (A) Proteins were separated on an 18% SDS gel. M: molecular mass standard; P: cell-free expressed protein; AC: protein purified by affinity chromatography. (B to E) UV/VIS absorbance spectra were acquired under oxidizing (black) and reducing (gray) conditions. The inset shows the redox difference spectrum. (B) Cf-apo-cyt.  $b_6$  ( $3 \mu\text{M}$ ) was mixed with heme ( $6 \mu\text{M}$ ). (C) cf-cyt.  $b_6$ -AB was mixed with cf-cyt.  $b_6$ -CD in a one-to-one ratio ( $1 \mu\text{M}$  each), and heme ( $2 \mu\text{M}$ ) was added in total protein to a heme ratio of one to one. (D) cf-cyt.  $b_6$ -AB ( $2 \mu\text{M}$ ) was mixed with heme ( $2 \mu\text{M}$ ) and (E) cf-cyt.  $b_6$ -CD ( $2 \mu\text{M}$ ) was mixed with heme ( $2 \mu\text{M}$ ). Note that different concentrations of protein and heme were used in (B) compared to (C), (D) and (E). The spectra in (B), (C) and (D) show the typical cyt.  $b_6$  absorbance maxima (ox:  $562 \text{ nm} / 531 \text{ nm} / 414 \text{ nm}$ , red:  $562 \text{ nm} / 532 \text{ nm} / 429 \text{ nm}$ , redox:  $562 \text{ nm} / 532 \text{ nm}$  for the  $\alpha$ - $\beta$ - $\gamma$ -band).

<https://doi.org/10.1371/journal.pone.0189532.g003>

respectively, it was conceivable that already a homodimer of one of the two cyt.  $b_6$  halves is able to bind heme. To tackle this possibility, each cyt.  $b_6$  halve was mixed separately with heme. Cf-cyt.  $b_6$ -AB shows typical, well-defined cyt.  $b_6$ -like absorption characteristics under both, oxidizing and reducing conditions (Fig 3D). Thus, already cf-cyt  $b_6$ -AB alone seems to

be able to bind heme and to form a cyt  $b_6$ -like four-helix bundle structure. In contrast, while the absorption spectrum of cf-cyt.  $b_6$ -CD under oxidizing conditions shows a slightly shifted SORET-band absorbance maximum at 414 nm after heme addition (Fig 3E), under reducing conditions, no well-defined absorbance bands were visible in the absorbance spectrum and only a broad band at 426 nm was evident. This indicates an imperfect and (if at all) only very limited binding of heme to cyt.  $b_6$ -CD, when the cyt.  $b_6$ -AB half is not present. Thus, cf-cyt  $b_6$ -CD might be able to weakly bind heme under oxidizing, but does not bind heme under reducing conditions. However, these observations now raised the question, which of the cyt  $b_6$  halves actually contributed to the absorbance spectra shown in Fig 3C, where the two halves were mixed equimolarly. Was a well-defined spectrum observed due to exclusive formation of cyt  $b_6$ -AB homodimers? While we cannot completely exclude that a small amount of cyt  $b_6$ -AB homodimers had formed, the spectral characteristics strongly indicate formation of a cyt  $b_6$ -like protein from the two halves. As cyt  $b_6$ -CD does form a rather unstable heme-binding homodimer (if at all) under oxidizing conditions and does not form a cyt  $b_6$ -like structure at all under reducing conditions (Fig 3E), formation of a cyt  $b_6$ -like structure solely by the cyt.  $b_6$ -AB fragment would have left half of the heme molecules free in solution. Thus, the absorbance spectrum of the sample would be far less defined with more spectral contributions from free heme. Since this clearly is not the case, the majority of the dimers contributing to the absorbance spectra in Fig 3C seem to be heterodimers of cf-cyt.  $b_6$ -AB and cf-cyt.  $b_6$ -CD.

In summary, the two cyt.  $b_6$  halves bind heme without being linked by the BC loop. The cyt.  $b_6$ -AB half by itself can bind heme efficiently, when the cyt.  $b_6$ -CD half is not present, albeit the heterodimer of the AB and CD fragments appears to be more stable. Consequently, our data indicate that the BC-loop does not significantly influence assembly of a cyt.  $b_6$ -like protein and, therefore, is not essential for holo-protein assembly.

### Cyt. $b_6$ assembles from TM fragments

Since the BC-loop appears to be of no particular importance for assembly of cyt.  $b_6$ , we next asked the question whether the cyt.  $b_6$  TM fragments are able to bind heme without any connecting loop. Therefore, apo-cyt.  $b_6$  was first reconstituted with heme and the holo-protein was proteolytically digested by addition of proteinase K, which efficiently digests proteins [71]. However, complete digestion was not expected, since the cyt.  $b_6$  TM fragments were embedded in a “shielding” detergent micelle and potentially also the amino acids close to the TM region were still protected by the detergent micelle. Digestion of holo-cyt.  $b_6$  by proteinase K was stopped at distinct time points and absorbance spectra were measured to analyze whether heme was still bound (Fig 4A and 4B). Even 5 h after digestion, the spectra displayed absorbance maxima characteristic for properly assembled holo-cyt.  $b_6$ , demonstrating that the heme cofactors remained bound after proteolysis. Surprisingly, under reducing conditions the absorbance heights of the band maxima of digested holo-cyt.  $b_6$  were increased compared to the undigested protein and the peaks appeared to be sharpened. This might indicate that soluble regions slightly hinder formation of the most stable b-type cytochrome in the wt protein, and the four TM helices of cyt.  $b_6$  potentially pack more closely when the soluble regions are removed. SDS-PAGE analysis of the digested cyt.  $b_6$  protein showed that already after 10 min no protein band corresponding to the mass of the full-length protein was detected anymore, and only protein fragments with molecular masses in the range of 8–15 kDa appeared (S3A Fig). Importantly, a sample incubated for the same time without proteinase K did not show any sign of degradation, emphasizing that proteolysis of cyt.  $b_6$  was strictly due to proteinase K. Western blot analysis, using specific antibodies directed against the cyt.  $b_6$  C- or N-terminus, respectively, did not detect any protein after 5 h of digestion (S3B and S3C Fig). This

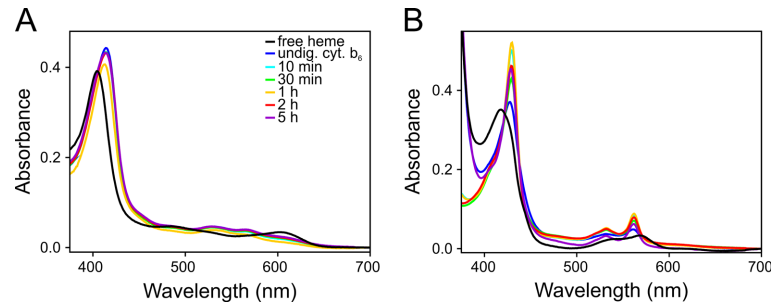

**Fig 4. Absorbance spectra of cyt.  $b_6$  after proteolysis.** (A, B) Holo-cyt.  $b_6$  was proteolytically digested with proteinase K. At defined time points (10 min light blue, 30 min green, 1 h yellow, 2 h red, 5 h purple) proteolysis was stopped and absorbance spectra were measured under oxidizing (A) and reducing conditions (B). As a control, the absorbance spectra of free heme (black) and reconstituted, undigested cyt.  $b_6$  (dark blue) were measured. The color legend in (A) also applies to (B). All spectra show the cyt.  $b_6$  characteristic maxima (ox: 562 nm / 531 nm / 414 nm, red: 562 nm / 532 nm / 429 nm, for the  $\alpha$ - $\beta$ - $\gamma$ -band).

<https://doi.org/10.1371/journal.pone.0189532.g004>

indicates that, although the soluble protein regions were proteolytically removed, the characteristic absorbance spectra originate from a cyt.  $b_6$ -like protein assembled from fragments that are still competent to bind heme.

However, do the cyt.  $b_6$  TM helices still bind the hemes during/after proteolysis or are other fragments involved in (artificial) heme binding? The [S4A and S4B Fig](#) show absorbance spectra of a cyt.  $b_6$  variant recorded under oxidizing and reducing conditions. This cyt.  $b_6$  mutant does not bind heme due to mutation of two heme ligating His residues (cyt.  $b_6$  H86A and H187A) [8]. As described before, the apo-protein was proteolytically digested with proteinase K. At defined time points, proteolysis was stopped by addition of PMSF and 5  $\mu$ M heme was added before acquiring absorbance spectra under oxidizing and reducing conditions. All spectra show solely maxima, characteristic for free, unbound heme. This indicates that not only the cyt.  $b_6$  H86A H187A full-length protein but also the proteolytic fragments of this cyt.  $b_6$  variant are unable to bind heme. It can therefore be concluded that the cyt.  $b$ -type absorbance spectra shown in [Fig 4](#) are due to binding of heme to the cyt.  $b_6$  TM four-helix bundle.

To more clearly identify the cyt.  $b_6$  fragments involved in heme binding, reconstituted cyt.  $b_6$  was proteolytically digested with proteinase K for 5 h and the remaining protein fragments were separated by gel permeation chromatography. Absorbance was measured at 280 and 414 nm for detection of protein and heme, respectively ([Fig 5A](#)). At an elution volume of  $\sim$ 12.5 mL, a main peak appeared at both wavelengths, indicating that here protein fragments elute together with bound heme. Via SDS-PAGE-analyses we identified protein fragments with molecular masses in the range of 5–10 kDa ([Fig 5B](#)). The amino acid sequences of the fragments involved in heme binding after proteolysis were subsequently identified by mass spectrometry. A detailed list of all identified peptides can be found in the supplement ([S2 Table](#)). In this analysis, all four cyt.  $b_6$  TM helices were identified, albeit without the connecting inter-helical AB- and CD-loops. The identified fragments correspond to TM helices A to D with some amino acids of the flanking loops remaining. Thus, proteinase K only digested the protein in the soluble regions, leaving the detergent-shielded TM helices intact. An exception of this is the TM helix B and the BC-loop. Some of the helix B fragments still include all the BC-loop amino acids and a few of the fragments even contained some amino acids of TM helix C. Thus, the detergent micelle seems to partly shield this loop from digestion since these amino acids likely do not protrude thus far into the bulk solution.

These results confirm the assumption that the cyt.  $b_6$  TM helices were largely protected against proteolysis by the detergent micelle. Although the helices were no longer connected via

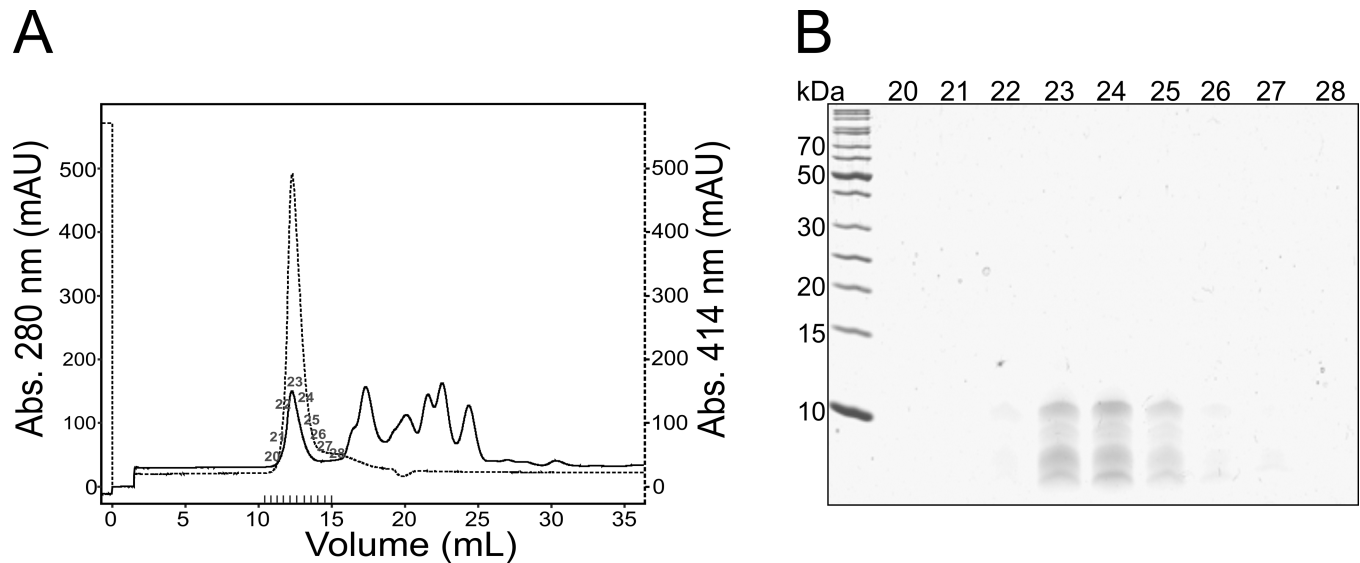

**Fig 5. Gel permeation chromatography (A) and SDS-PAGE-analysis (B) of proteolytically digested cyt.  $b_6$ .** A gel permeation column was loaded with 0.5 mg cyt.  $b_6$  that was proteolytically digested with proteinase K for 5 h. Separation was done with 50 mM Tris pH 8, 50 mM NaCl and 1 mM DDM. The chromatogram (A) shows the absorption at 280 nm (continuous) and 414 nm (dashed) for protein and heme, respectively. Proteins in the elution fractions 20–28 (each 1 mL) were precipitated and the samples were separated on an 18% SDS gel (B).

<https://doi.org/10.1371/journal.pone.0189532.g005>

the interhelical AB- and CD-loops after proteolysis and only in part via the BC-loop, the heme cofactor remained bound and the cyt.  $b_6$  fragments were still able to properly bind the cofactors.

## Discussion

Cyt.  $b_6$  spontaneously binds two heme cofactors non-covalently, and *in vitro* assembly of the holo-protein can be followed spectroscopically [29, 30, 32]. On each helical hairpin of the heme-binding four-helix bundle (AB and CD), two His residues are conserved in one helix, and two of these His residues have predominant functions during heme binding [8]. Furthermore, Gly residues are conserved in the other TM helix of the helical TM hairpin, which are crucial for heme packing as they provide space for tight packing and an optimal fit for the heme [72]. The two helical hairpins (AB and CD) have an inverse TM topology, and thus, the di-heme cyt.  $b_6$  protein has an internal quasi-two-fold symmetry with the two related helical hairpins oriented at 180 degrees to each other [73].

A likely cyt.  $b_6$  folding pathway involves initial formation of the two helical-hairpins (helix pairs AB and CD) after integration of the TM helices into the membrane. Subsequently, the first heme ( $b_L$ ) binds [8]. Most likely, the structure of the four-helix bundle is not closed when the first heme ( $b_L$ ) is bound, since the second heme ( $b_H$ ) has to bind and the heme  $b_H$  binding niche has to be accessible. It appears to be likely that molecular interactions stabilize binding of heme  $b_L$  primarily at the surface of the helical hairpin formed by the TM helices A and B. Binding of the second heme ( $b_H$ ) is mediated and predominately stabilized by the heme-binding half-cavity, formed by the helical hairpin CD [8]. Binding of heme  $b_H$  obviously triggers formation of the final two heme-binding four TM helix bundle structure, which appears to be a prerequisite for subsequent assembly of the entire cytochrome  $b_6f$  complex [48, 51]. Thus, formation of the two helical hairpin structures is crucial during assembly of the holo-protein. The two cyt.  $b_6$  halves have to be in close proximity to initially form an “open” heme binding cavity, which apparently tightens up after binding of the second b-type heme. Because of this,

we initially anticipated that the loop region connecting the helical hairpins AB and CD might be vital for formation of a heme-accepting structure. The loop connecting the helical hairpins AB and CD mainly contains amino acids with relatively big side chains (Lys111, Lys112, Arg114 and Glu115), which limits the rotational freedom of the polypeptide chain. This results in a rather rigid conformation, which will distinctly position the two helical hairpins with respect to each other. The inflexible nature of the loop is further enhanced by the heterocyclic ring structure of proline (Pro113), which prevents free rotation of the  $C_{\alpha}$ -N-bond. However, as shown in the present study, elongation of the BC-loop had essentially no effect on the assembly and folding of cyt.  $b_6$ , albeit the loop length was more than doubled. The small Gly side chains increased the flexibility of the BC-loop, and poly-Gly chains with a length of ten or more amino acids are known to have a freedom of movement comparable to a freely movable chain [74]. Thus, insertion of multiple Gly residues into the cyt.  $b_6$  BC-loop not only increased the distance between the cyt.  $b_6$  protein halves, but also severely enhanced the freedom of movement of the two helical hairpin structures. The cyt.  $b_6$ -G<sub>n</sub>-mutants still bound two heme molecules with high affinity (Fig 2A, 2B and 2C). Hence, prolongation of the BC-loop does not severely affect the heme-binding equilibrium. Furthermore, when destabilized by successive addition of the harsh detergent SDS, all three proteins started releasing bound heme at ~4.5 mM SDS (Fig 2D), indicating a similar stability of the proteins. The close spatial proximity between the two cyt.  $b_6$  halves, which is induced by the relatively short loop, seems to not be crucial for high-affinity heme binding, and consequently the increased loop flexibility does not impair cofactor binding. These conclusions were further supported by the experiments with the separately produced cyt.  $b_6$  halves gained by cell-free expression. From these two individually structured halves, a stable holo-cyt.  $b_6$  structure can be assembled (Fig 3C). Thus, a covalent connection between the protein halves, correctly positioning the halves, is not essential for assembly. Furthermore, a cyt  $b_6$ -like protein assembled even from solely the AB fragment, albeit formation of the ABCD structure appears to be favored. Together, TM helix-helix interactions and cofactor binding are sufficient for assembly of cyt.  $b_6$  from the two helical hairpins AB and CD, and the cyt.  $b_6$  BC-loop does not crucially affect protein assembly and stability.

But what about the remaining loops connecting TM helices AB and CD, respectively? To start defining the role of the covalent TM helix linkages on folding, assembly and stability of cyt.  $b_6$ , we removed the soluble regions of holo-cyt.  $b_6$  by proteinase K (S3 Fig). The soluble regions of the full-length protein were largely proteolyzed after five hours, as judged by SDS-PAGE- and Western blot analyses. Nevertheless, the absorbance spectra did not significantly change (Fig 4A and 4B) and still indicated a six-fold coordination of the central heme iron, strongly suggesting that heme is still bound by the fragments, which remained after proteolysis. In fact, the spectra indicate that the heme environment is even better defined after proteolysis, and thus, the cyt.  $b_6$  structure appears to tighten up when soluble protein regions are cleaved off. The fragments responsible for the conserved heme-binding capacity were identified by mass spectrometry, and identified as the four cyt.  $b_6$  TM helices without the interhelical AB- and CD-loops. Solely some B helices carried an intact BC-loop after proteolysis. This is probably due to partial shielding of this short loop by the detergent micelle against the protease. Importantly, the before described experiments clearly exclude that this loop was crucial for formation of a b-type cytochrome structure. Taken all of these results into account, the TM helices seem to be able to stay assembled *in vitro* after cleavage of the interhelical loops and the cleaved fragments are able to bind heme. This indicates that assembly of cyt.  $b_6$  is mainly driven by interhelical interactions, like specific Van der Waals interactions, salt bridges or hydrogen bonds.

## Conclusion

Interhelical loops are not vital for assembly of the TM cyt.  $b_6$ , and thus, the four-helix bundle is mainly stabilized by interhelical interactions in the TM region. In the past, the structural organization of the four TM helices of the cyt.  $b_6$  protein and of the homologous first four helices of cytochrome b have often served as a template for the design of water-soluble, di-heme-binding cytochrome models [42–44, 60, 75]. For enhancing van der Waals packing of the heme to the protein moiety, topologically defined four-helix bundles were designed and synthesized, which closely mimic the heme-binding core of cyt.  $b_6$ , *i.e.* helices B/D and A/C, respectively [45]. Here, two different helices were synthesized: a heme-binding helix, which contains the conserved His and Arg residues involved in heme binding, as well as a second, heme-shielding helix, which contains the conserved Gly residues crucial for heme packing. However, the two helices were covalently linked, mimicking the helical hairpin structure found in cyt.  $b_6$ . In contrast to a membrane environment, assembly of a water-soluble four-helix bundle is mainly driven by formation of the hydrophobic bundle core. Consequently, further optimization of heme-binding properties within the hydrophobic membrane environment is needed.

In recent years, heme-binding four-helix bundles have been designed that reside within the hydrophobic environment of micelles or lipid bilayers [40, 76, 77]. However, the designed proteins bound heme with a rather low affinity, indicating that the forces driving assembly of b-type cytochromes severely differ in a polar aqueous *vs.* non-polar membranous environment. As shown in the present study, specific TM helix-helix interactions likely result in formation of a TM cyt.  $b_6$  holo-protein structure, competent for high-affinity heme binding. Thus, the future design of heme-binding TM four-helix bundles having optimized heme-binding properties within the hydrophobic membrane environment should include the design of helix bundle structures with stable TM helix-helix interactions, which create a predefined heme-binding cavity.

## Supporting information

**S1 Table. Primer sequences.** Sequences of the primers used for insertion of Gly residues into the BC loop. Gly-codons are in bold, restriction sites are underlined.

(DOCX)

**S2 Table. Cyt.  $b_6$  fragments identified by mass spectrometry after proteolytic digestion.** All cyt.  $b_6$  fragments identified by mass spectrometry containing the sequence of a single cyt.  $b_6$  TM helix either in full-length or part of it with some amino acids of the flanking loops. An exception of this is TM helix B since some helix B fragments still contain the complete sequence of the BC-loop and a few of these fragments also contain amino acids of TM helix C. The TM areas are printed in bold. Amino acid residues flanking the detected peptides are indicated in parentheses.

(DOCX)

**S1 Fig. Expression and purification of cyt.  $b_6$  and the  $G_n$ -mutants containing prolonged BC loops.** Proteins were separated on 14% SDS gels. (A) cyt.  $b_6$ , (B) cyt.  $b_6$ - $G_5$ , (C) cyt.  $b_6$ - $G_{10}$ .  $G_5$  and  $G_{10}$  stands for the number of Gly residues inserted into the BC loop. M: molecular mass standard; C: total cell extract before induction (control); CE: total cell extract before harvesting; S: soluble protein fraction; IB: inclusion body fraction; AC: protein purified by affinity chromatography.

(TIF)

**S2 Fig. Western blot analysis of purified cf-cyt.  $b_6$ , cf-cyt.  $b_6$ -AB and cf-cyt.  $b_6$ -CD.** Ni-NTA purified proteins were separated on an 18% SDS gel and blotted on a PVDF membrane.

For immunologic detection, antibodies directed against the cyt. b<sub>6</sub> N-terminus (A, B), cyt. b<sub>6</sub> C-terminus (C) or His-tag (D) were used.  
(TIF)

**S3 Fig. SDS-PAGE and Western-blot analysis of proteolytically digested holo-cyt. b<sub>6</sub>.** Proteolysis of reconstituted holo-cyt. b<sub>6</sub> (A, B, C) was stopped at various times. Proteins were separated on 18% (A, B, C) SDS gels and blotted on PVDF membranes (B, C). For immunological detection, antibodies directed against the cyt. b<sub>6</sub> N-terminus (B) or cyt. b<sub>6</sub> C-terminus (C) were used. PK: Proteinase K, C: cyt. b<sub>6</sub> before digestion, NC: cyt. b<sub>6</sub> incubated 5 h without proteinase K (negative control), 10: 10 min, 30: 30 min, 1h: 1 h, 2h: 2 h, 5h: 5 h of digestion.  
(TIF)

**S4 Fig. Absorbance spectra of cyt. b<sub>6</sub> H86A H187A after proteolysis.** (A, B) Apo-cyt. b<sub>6</sub> H86A H187A was proteolytically digested with proteinase K. At defined time points (10 min light blue, 30 min green, 1 h yellow, 2 h red, 5 h purple) proteolysis was stopped by addition of PMSF and 5 μM heme was added before acquiring absorbance spectra under oxidizing (C) and reducing conditions (D). As a control, the absorbance spectra of free heme (black) and reconstituted, undigested cyt. b<sub>6</sub> (dark blue) were measured. All spectra of cyt. b<sub>6</sub> (digested or not) show the maxima characteristic for free heme (ox: 603 nm / 405 nm, red: 566 nm / 541 nm / 418–420 nm, for the α-/β-/γ-band).  
(TIF)

## Author Contributions

**Conceptualization:** Lydia Tome-Stangl, Cornelia Schaetzel, Dirk Schneider.

**Formal analysis:** Lydia Tome-Stangl, Cornelia Schaetzel, Dirk Schneider.

**Funding acquisition:** Dirk Schneider.

**Investigation:** Lydia Tome-Stangl, Cornelia Schaetzel, Stefan Tenzer, Frank Bernhard.

**Methodology:** Stefan Tenzer, Frank Bernhard.

**Project administration:** Dirk Schneider.

**Resources:** Dirk Schneider.

**Validation:** Stefan Tenzer.

**Writing – original draft:** Lydia Tome-Stangl, Dirk Schneider.

**Writing – review & editing:** Cornelia Schaetzel, Stefan Tenzer, Frank Bernhard, Dirk Schneider.

## References

1. Popot JL, Engelman DM. Membrane protein folding and oligomerization: the two-stage model. *Biochemistry*. 1990; 29(17):4031–7. Epub 1990/05/01. PMID: [1694455](https://pubmed.ncbi.nlm.nih.gov/1694455/)
2. Popot JL, Engelman DM. Helical membrane protein folding, stability, and evolution. *Annu Rev Biochem*. 2000; 69:881–922. Epub 2000/08/31. <https://doi.org/10.1146/annurev.biochem.69.1.881> PMID: [10966478](https://pubmed.ncbi.nlm.nih.gov/10966478/)
3. Cymer F, von Heijne G, White SH. Mechanisms of integral membrane protein insertion and folding. *J Mol Biol*. 2015; 427(5):999–1022. Epub 2014/10/04. <https://doi.org/10.1016/j.jmb.2014.09.014> PMID: [25277655](https://pubmed.ncbi.nlm.nih.gov/25277655/)
4. Bowie JU. Solving the membrane protein folding problem. *Nature*. 2005; 438(7068):581–9. Epub 2005/12/02. <https://doi.org/10.1038/nature04395> PMID: [16319877](https://pubmed.ncbi.nlm.nih.gov/16319877/)



5. Wittung-Stafshede P. Role of cofactors in protein folding. *Acc Chem Res.* 2002; 35(4):201–8. Epub 2002/04/17. PMID: [11955048](#)
6. Martinez-Gil L, Mingarro I. Viroporins, Examples of the Two-Stage Membrane Protein Folding Model. *Viruses.* 2015; 7(7):3462–82. Epub 2015/07/02. <https://doi.org/10.3390/v7072781> PMID: [26131957](#)
7. Engelman DM, Chen Y, Chin CN, Curran AR, Dixon AM, Dupuy AD, et al. Membrane protein folding: beyond the two stage model. *FEBS Lett.* 2003; 555(1):122–5. Epub 2003/11/25. PMID: [14630331](#)
8. Dreher C, Prodohl A, Hielscher R, Hellwig P, Schneider D. Multiple step assembly of the transmembrane cytochrome b<sub>6</sub>. *J Mol Biol.* 2008; 382(4):1057–65. Epub 2008/07/29. <https://doi.org/10.1016/j.jmb.2008.07.025> PMID: [18656488](#)
9. Prodohl A, Volkmer T, Finger C, Schneider D. Defining the structural basis for assembly of a transmembrane cytochrome. *J Mol Biol.* 2005; 350(4):744–56. Epub 2005/06/14. <https://doi.org/10.1016/j.jmb.2005.05.016> PMID: [15950240](#)
10. Schneider D, Finger C, Prodohl A, Volkmer T. From interactions of single transmembrane helices to folding of alpha-helical membrane proteins: analyzing transmembrane helix-helix interactions in bacteria. *Curr Protein Pept Sci.* 2007; 8(1):45–61. Epub 2007/02/20. PMID: [17305560](#)
11. Tusnady GE, Simon I. Principles governing amino acid composition of integral membrane proteins: application to topology prediction. *J Mol Biol.* 1998; 283(2):489–506. Epub 1998/10/14. <https://doi.org/10.1006/jmbi.1998.2107> PMID: [9769220](#)
12. Jones DT, Taylor WR, Thornton JM. A model recognition approach to the prediction of all-helical membrane protein structure and topology. *Biochemistry.* 1994; 33(10):3038–49. Epub 1994/03/15. PMID: [8130217](#)
13. Choi Y, Agarwal S, Deane CM. How long is a piece of loop? *PeerJ.* 2013; 1:e1. Epub 2013/05/03. <https://doi.org/10.7717/peerj.1> PMID: [23638343](#)
14. Booth PJ, Templer RH, Meijberg W, Allen SJ, Curran AR, Lorch M. In vitro studies of membrane protein folding. *Crit Rev Biochem Mol Biol.* 2001; 36(6):501–603. Epub 2002/01/19. <https://doi.org/10.1080/20014091074246> PMID: [11798093](#)
15. Kahn TW, Engelman DM. Bacteriorhodopsin can be refolded from two independently stable transmembrane helices and the complementary five-helix fragment. *Biochemistry.* 1992; 31(26):6144–51. Epub 1992/07/07. PMID: [1627558](#)
16. Huang KS, Bayley H, Liao MJ, London E, Khorana HG. Refolding of an integral membrane protein. Denaturation, renaturation, and reconstitution of intact bacteriorhodopsin and two proteolytic fragments. *J Biol Chem.* 1981; 256(8):3802–9. Epub 1981/04/25. PMID: [7217055](#)
17. Marti T. Refolding of bacteriorhodopsin from expressed polypeptide fragments. *J Biol Chem.* 1998; 273(15):9312–22. Epub 1998/05/16. PMID: [9535926](#)
18. Allen SJ, Kim JM, Khorana HG, Lu H, Booth PJ. Structure and function in bacteriorhodopsin: the effect of the interhelical loops on the protein folding kinetics. *J Mol Biol.* 2001; 308(2):423–35. Epub 2001/05/01. <https://doi.org/10.1006/jmbi.2001.4604> PMID: [11327777](#)
19. Kim JM, Booth PJ, Allen SJ, Khorana HG. Structure and function in bacteriorhodopsin: the role of the interhelical loops in the folding and stability of bacteriorhodopsin. *J Mol Biol.* 2001; 308(2):409–22. Epub 2001/05/01. <https://doi.org/10.1006/jmbi.2001.4603> PMID: [11327776](#)
20. Tastan O, Klein-Seetharaman J, Meirovitch H. The effect of loops on the structural organization of alpha-helical membrane proteins. *Biophys J.* 2009; 96(6):2299–312. Epub 2009/03/18. <https://doi.org/10.1016/j.bpj.2008.12.3894> PMID: [19289056](#)
21. Ulmschneider MB, Tieleman DP, Sansom MS. The role of extra-membranous inter-helical loops in helix-helix interactions. *Protein Eng Des Sel.* 2005; 18(12):563–70. Epub 2005/10/28. <https://doi.org/10.1093/protein/gzi059> PMID: [16251222](#)
22. Ridge KD, Lee SS, Yao LL. In vivo assembly of rhodopsin from expressed polypeptide fragments. *Proc Natl Acad Sci U S A.* 1995; 92(8):3204–8. Epub 1995/04/11. PMID: [7724540](#)
23. Ridge KD, Lee SS, Abdulaev NG. Examining rhodopsin folding and assembly through expression of polypeptide fragments. *J Biol Chem.* 1996; 271(13):7860–7. Epub 1996/03/29. PMID: [8631831](#)
24. Landin JS, Katragadda M, Albert AD. Thermal destabilization of rhodopsin and opsin by proteolytic cleavage in bovine rod outer segment disk membranes. *Biochemistry.* 2001; 40(37):11176–83. Epub 2001/09/12. PMID: [11551216](#)
25. Stroebel D, Choquet Y, Popot JL, Picot D. An atypical haem in the cytochrome b(6)f complex. *Nature.* 2003; 426(6965):413–8. Epub 2003/12/04. <https://doi.org/10.1038/nature02155> PMID: [14647374](#)
26. Baniulis D, Yamashita E, Whitelegge JP, Zatsman AI, Hendrich MP, Hasan SS, et al. Structure-Function, Stability, and Chemical Modification of the Cyanobacterial Cytochrome b<sub>6</sub>f Complex from *Nostoc* sp. PCC 7120. *J Biol Chem.* 2009; 284(15):9861–9. Epub 2009/02/05. <https://doi.org/10.1074/jbc.M809196200> PMID: [19189962](#)

27. Kurisu G, Zhang H, Smith JL, Cramer WA. Structure of the cytochrome b<sub>6</sub>f complex of oxygenic photosynthesis: tuning the cavity. *Science*. 2003; 302(5647):1009–14. Epub 2003/10/04. <https://doi.org/10.1126/science.1090165> PMID: 14526088
28. Dreher C, Hielscher R, Prodohl A, Hellwig P, Schneider D. Characterization of two cytochrome b<sub>6</sub> proteins from the cyanobacterium *Gloeobacter violaceus* PCC 7421. *J Bioenerg Biomembr*. 2010; 42(6):517–26. Epub 2010/03/20. <https://doi.org/10.1007/s10863-010-9279-6> PMID: 20237831
29. Dreher C, Prodohl A, Weber M, Schneider D. Heme binding properties of heterologously expressed spinach cytochrome b<sub>6</sub>: implications for transmembrane b-type cytochrome formation. *FEBS Lett*. 2007; 581(14):2647–51. Epub 2007/05/22. <https://doi.org/10.1016/j.febslet.2007.05.007> PMID: 17511988
30. Prodohl A, Dreher C, Hielscher R, Hellwig P, Schneider D. Heterologous expression and in vitro assembly of the transmembrane cytochrome b<sub>6</sub>. *Protein Expr Purif*. 2007; 56(2):279–85. Epub 2007/09/26. <https://doi.org/10.1016/j.pep.2007.08.007> PMID: 17892950
31. Tome L, Schaetzel C, Dreher C, Schneider D. Fe- but not Mg-protoporphyrin IX binds to a transmembrane b-type cytochrome. *Mol Membr Biol*. 2013; 31(1):37–45. Epub 2013/12/18. <https://doi.org/10.3109/09687688.2013.867079> PMID: 24328791
32. Krolczewski J, Szczepaniak A. In vitro reconstitution of the spinach chloroplast cytochrome b<sub>6</sub> protein from a fusion protein expressed in *Escherichia coli*. *Biochim Biophys Acta*. 2002; 1598(1–2):177–84. Epub 2002/07/31. PMID: 12147358
33. Prodohl A, Weber M, Dreher C, Schneider D. A mutational study of transmembrane helix-helix interactions. *Biochimie*. 2007; 89(11):1433–7. Epub 2007/08/11. <https://doi.org/10.1016/j.biochi.2007.06.006> PMID: 17688996
34. Volkmer T, Becker C, Prodohl A, Finger C, Schneider D. Assembly of a transmembrane b-type cytochrome is mainly driven by transmembrane helix interactions. *Biochim Biophys Acta*. 2006; 1758(11):1815–22. Epub 2006/07/25. <https://doi.org/10.1016/j.bbamem.2006.05.009> PMID: 16860778
35. Francke C, Loyal R, Ohad I, Haehnel W. In vitro assembly of a beta<sub>2</sub> cytochrome b<sub>559</sub>-like complex from the chemically synthesised beta-subunit encoded by the *Synechocystis* sp. 6803 psbF gene. *FEBS Lett*. 1999; 442(1):75–8. Epub 1999/01/29. PMID: 9923608
36. Lujan MA, Martinez JI, Alonso PJ, Guerrero F, Roncel M, Ortega JM, et al. Reconstitution, spectroscopy, and redox properties of the photosynthetic recombinant cytochrome b<sub>559</sub> from higher plants. *Photosynth Res*. 2012; 112(3):193–204. Epub 2012/08/03. <https://doi.org/10.1007/s11120-012-9772-3> PMID: 22855209
37. Akdogan Y, Anbazhagan V, Hinderberger D, Schneider D. Heme binding constricts the conformational dynamics of the cytochrome b<sub>559</sub> heme binding cavity. *Biochemistry*. 2012; 51(36):7149–56. Epub 2012/08/18. <https://doi.org/10.1021/bi300489s> PMID: 22897206
38. Kramer DM, Crofts AR. Re-examination of the Properties and Function of the b-Cytochromes of the Thylakoid Cytochrome b<sub>6</sub>f Complex. *Biochimica Et Biophysica Acta-Bioenergetics*. 1994; 1184(2–3):193–201.
39. Krolczewski J, Hombek-Urban K, Szczepaniak A. Integration of the thylakoid membrane protein cytochrome b<sub>6</sub> in the cytoplasmic membrane of *Escherichia coli*. *Biochemistry*. 2005; 44(20):7570–6. <https://doi.org/10.1021/bi047422w> PMID: 15896000
40. Korendovych IV, Senes A, Kim YH, Lear JD, Fry HC, Therien MJ, et al. De novo design and molecular assembly of a transmembrane diporphyrin-binding protein complex. *J Am Chem Soc*. 2010; 132(44):15516–8. Epub 2010/10/16. <https://doi.org/10.1021/ja107487b> PMID: 20945900
41. Choma CT, Lear JD, Nelson MJ, Dutton PL, Robertson DE, Degradó WF. Design of a Heme-Binding 4-Helix Bundle. *J Am Chem Soc*. 1994; 116(3):856–65.
42. Robertson DE, Farid RS, Moser CC, Urbauer JL, Mulholland SE, Pidikiti R, et al. Design and synthesis of multi-haem proteins. *Nature*. 1994; 368(6470):425–32. Epub 1994/03/31. <https://doi.org/10.1038/368425a0> PMID: 8133888
43. Ghirlanda G, Osyczka A, Liu W, Antolovich M, Smith KM, Dutton PL, et al. De novo design of a D<sub>2</sub>-symmetrical protein that reproduces the diheme four-helix bundle in cytochrome bc<sub>1</sub>. *J Am Chem Soc*. 2004; 126(26):8141–7. Epub 2004/07/01. <https://doi.org/10.1021/ja039935g> PMID: 15225055
44. Rau HK, DeJonge N, Haehnel W. Modular synthesis of de novo-designed metalloproteins for light-induced electron transfer. *Proc Natl Acad Sci U S A*. 1998; 95(20):11526–31. Epub 1998/09/30. PMID: 9751699
45. Rau HK, Haehnel W. De-novo design of redox proteins. *Berichte Der Bunsen-Gesellschaft-Physical Chemistry Chemical Physics*. 1996; 100(12):2052–6.
46. Shifman JM, Gibney BR, Sharp RE, Dutton PL. Heme redox potential control in de novo designed four-alpha-helix bundle proteins. *Biochemistry*. 2000; 39(48):14813–21. Epub 2000/12/02. PMID: 11101297

47. Solomon LA, Kodali G, Moser CC, Dutton PL. Engineering the assembly of heme cofactors in man-made proteins. *J Am Chem Soc.* 2014; 136(8):3192–9. Epub 2014/02/06. <https://doi.org/10.1021/ja411845f> PMID: 24495285
48. Hasan SS, Yamashita E, Cramer WA. Transmembrane signaling and assembly of the cytochrome b<sub>6</sub>f lipidic charge transfer complex. *Biochim Biophys Acta.* 2013; 1827(11–12):1295–308. Epub 2013/03/20. <https://doi.org/10.1016/j.bbabi.2013.03.002> PMID: 23507619
49. Hildenbeutel M, Hegg EL, Stephan K, Gruschke S, Meunier B, Ott M. Assembly factors monitor sequential hemylation of cytochrome b to regulate mitochondrial translation. *J Cell Biol.* 2014; 205(4):511–24. Epub 2014/05/21. <https://doi.org/10.1083/jcb.201401009> PMID: 24841564
50. Kuras R, de Vitry C, Choquet Y, Girard-Bascou J, Culler D, Buschlen S, et al. Molecular genetic identification of a pathway for heme binding to cytochrome b<sub>6</sub>. *J Biol Chem.* 1997; 272(51):32427–35. Epub 1998/01/24. PMID: 9405452
51. Saint-Marcoux D, Wollman FA, de Vitry C. Biogenesis of cytochrome b<sub>6</sub> in photosynthetic membranes. *J Cell Biol.* 2009; 185(7):1195–207. Epub 2009/07/01. <https://doi.org/10.1083/jcb.200812025> PMID: 19564403
52. Smith PK, Krohn RI, Hermanson GT, Mallia AK, Gartner FH, Provenzano MD, et al. Measurement of Protein Using Bicinchoninic Acid. *Anal Biochem.* 1985; 150(1):76–85. PMID: 3843705
53. Schwarz D, Junge F, Durst F, Frolich N, Schneider B, Reckel S, et al. Preparative scale expression of membrane proteins in *Escherichia coli*-based continuous exchange cell-free systems. *Nat Protoc.* 2007; 2(11):2945–57. Epub 2007/11/17. <https://doi.org/10.1038/nprot.2007.426> PMID: 18007631
54. Ozols J, Strittmatter P. The Interaction of Porphyrins and Metalloporphyrins with Apocytochrome B<sub>5</sub>. *J Biol Chem.* 1964; 239(4):1018–&.
55. Distler U, Kuharev J, Navarro P, Levin Y, Schild H, Tenzer S. Drift time-specific collision energies enable deep-coverage data-independent acquisition proteomics. *Nat Methods.* 2014; 11(2):167–70. Epub 2013/12/18. <https://doi.org/10.1038/nmeth.2767> PMID: 24336358
56. Laemmli UK. Cleavage of structural proteins during the assembly of the head of bacteriophage T<sub>4</sub>. *Nature.* 1970; 227(5259):680–5. Epub 1970/08/15. PMID: 5432063
57. Towbin H, Staehelin T, Gordon J. Electrophoretic transfer of proteins from polyacrylamide gels to nitrocellulose sheets: procedure and some applications. *Proc Natl Acad Sci U S A.* 1979; 76(9):4350–4. Epub 1979/09/01. PMID: 388439
58. Cramer WA, Yan J, Zhang H, Kurisu G, Smith JL. Structure of the cytochrome b<sub>6</sub>f complex: new prosthetic groups, Q-space, and the 'hors d'oeuvres hypothesis' for assembly of the complex. *Photosynth Res.* 2005; 85(1):133–43. Epub 2005/06/25. <https://doi.org/10.1007/s11220-004-2149-5> PMID: 15977064
59. Gibney BR, Rabanal F, Reddy KS, Dutton PL. Effect of four helix bundle topology on heme binding and redox properties. *Biochemistry.* 1998; 37(13):4635–43. <https://doi.org/10.1021/bi971856s> PMID: 9521784
60. Huang SS, Koder RL, Lewis M, Wand AJ, Dutton PL. The HP-1 maquette: from an apoprotein structure to a structured hemoprotein designed to promote redox-coupled proton exchange. *Proc Natl Acad Sci U S A.* 2004; 101(15):5536–41. Epub 2004/04/02. <https://doi.org/10.1073/pnas.0306676101> PMID: 15056758
61. Rau HK, Haehnel W. Design, synthesis, and properties of a novel cytochrome b model. *J Am Chem Soc.* 1998; 120(3):468–76.
62. Rojas NRL, Kamtekar S, Simons CT, Mclean JE, Vogel KM, Spiro TG, et al. De novo heme proteins from designed combinatorial libraries. *Protein Sci.* 1997; 6(12):2512–24. <https://doi.org/10.1002/pro.5560061204> PMID: 9416601
63. Babcock GT, Widger WR, Cramer WA, Oertling WA, Metz JG. Axial Ligands of Chloroplast Cytochrome-B-559—Identification and Requirement for a Heme-Cross-Linked Polypeptide Structure. *Biochemistry.* 1985; 24(14):3638–45. PMID: 2994713
64. Stuart AL, Wasserman AR. Purification of cytochrome b<sub>6</sub>. A tightly bound protein in chloroplast membranes. *Biochim Biophys Acta.* 1973; 314(3):284–97. Epub 1973/09/26. PMID: 4751231
65. Hurt E, Hauska G. Identification of the polypeptides in the cytochrome b<sub>6</sub>/f complex from spinach chloroplasts with redox-center-carrying subunits. *J Bioenerg Biomembr.* 1982; 14(5–6):405–24. Epub 1982/12/01. PMID: 6819297
66. Boronowsky U, Wenk S, Schneider D, Jager C, Rogner M. Isolation of membrane protein subunits in their native state: evidence for selective binding of chlorophyll and carotenoid to the b(6) subunit of the cytochrome b(6)f complex. *Biochim Biophys Acta.* 2001; 1506(1):55–66. Epub 2001/06/22. PMID: 11418097

67. Lau FW, Bowie JU. A method for assessing the stability of a membrane protein. *Biochemistry*. 1997; 36(19):5884–92. Epub 1997/05/13. <https://doi.org/10.1021/bi963095j> PMID: 9153430
68. Otzen DE. Folding of DsbB in mixed micelles: a kinetic analysis of the stability of a bacterial membrane protein. *J Mol Biol*. 2003; 330(4):641–9. Epub 2003/07/10. PMID: 12850136
69. Sehgal P, Mogensen JE, Otzen DE. Using micellar mole fractions to assess membrane protein stability in mixed micelles. *Biochim Biophys Acta*. 2005; 1716(1):59–68. Epub 2005/09/20. <https://doi.org/10.1016/j.bbamem.2005.08.006> PMID: 16168383
70. Rath A, Deber CM. Correction factors for membrane protein molecular weight readouts on sodium dodecyl sulfate-polyacrylamide gel electrophoresis. *Anal Biochem*. 2013; 434(1):67–72. Epub 2012/12/04. <https://doi.org/10.1016/j.ab.2012.11.007> PMID: 23201391
71. Sambrook J, Russell DW. *Molecular cloning: a laboratory manual*. 3rd. ed ed. New York: Cold Spring Harbor Laboratory; 2001.
72. Esposti MD, De Vries S, Crimi M, Ghelli A, Patarnello T, Meyer A. Mitochondrial cytochrome b: evolution and structure of the protein. *Biochim Biophys Acta*. 1993; 1143(3):243–71. Epub 1993/07/26. PMID: 8329437
73. Koch HG, Schneider D. Biogenesis of membrane-bound b-type cytochromes. In: Cramer WA, Kallas T, editors. *Adv Photosynth Respir*. Dordrecht: Springer; 2016.
74. Flory PJ, Schimmel PR. Dipole moments in relation to configuration of polypeptide chains. *J Am Chem Soc*. 1967; 89(26):6807–13. Epub 1967/12/20. PMID: 6064350
75. Schneider S, Marles-Wright J, Sharp KH, Paoli M. Diversity and conservation of interactions for binding heme in b-type heme proteins. *Nat Prod Rep*. 2007; 24(3):621–30. Epub 2007/05/31. <https://doi.org/10.1039/b604186h> PMID: 17534534
76. Ye S, Discher BM, Strzalka J, Xu T, Wu SP, Noy D, et al. Amphiphilic four-helix bundle peptides designed for light-induced electron transfer across a soft interface. *Nano Lett*. 2005; 5(9):1658–67. Epub 2005/09/15. <https://doi.org/10.1021/nl050542k> PMID: 16159202
77. Goparaju G, Fry BA, Chobot SE, Wiedman G, Moser CC, Dutton PL, et al. First principles design of a core bioenergetic transmembrane electron-transfer protein. *Biochim Biophys Acta*. 2016; 1857(5):503–12. Epub 2015/12/18. <https://doi.org/10.1016/j.bbabi.2015.12.002> PMID: 26672896
